# Supplementary material for: CREBBP inactivation sensitizes B cell acute lymphoblastic leukemia to ferroptotic cell death upon BCL2 inhibition
Source: Springer Nature journal article supplement (doi:10.1038/s41467-025-59531-6), 2025-05-20

**Supplementary Data Table 1:** Cell viability data from small molecule screen in 697<sup>WT</sup>, 697<sup>KI</sup> and 697<sup>KO</sup> cell lines (related to figure 1). One-way Brown-Forsythe and Welch ANOVA test with Dunnett T3 comparison comparing to 697<sup>WT</sup> used for statistical analysis, unless specified with a \* where unpaired T-test used. n=3 technical replicates.

**Supplementary Data Table 2:** Differentially regulated proteins. Two-sided limma statistical test. To control for the false discovery rate (FDR), p-values were adjusted using the Benjamini-Hochberg method for multiple testing correction.

**Supplementary Data Table 3:** Lipidomics raw data, standards and parameters.

**Supplementary Data Table 4:** Two-sided Pearson correlation with p-value adjusted for multiple testing using Bonferroni correction of gene expression with *CREBBP* expression in the TARGET phase 2 RNAseq cohort. Gene sets for ferroptosis are shown.

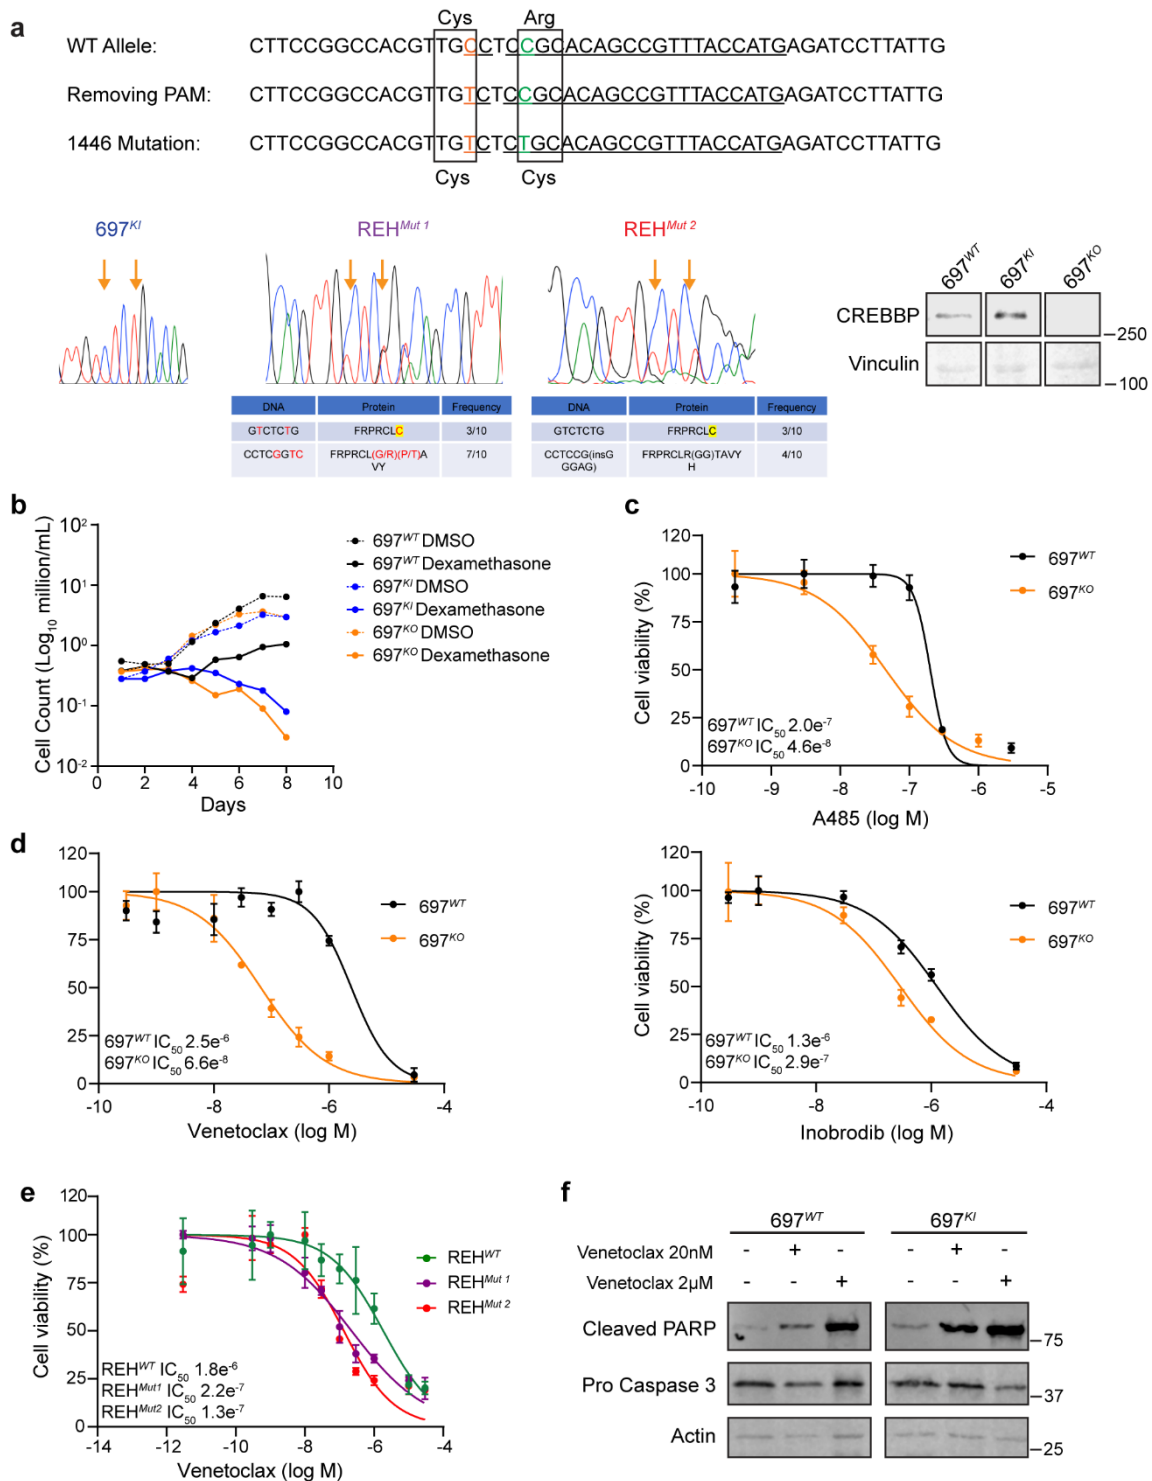

**Supplementary Figure 1: CREBBP-mutated B-ALL cell lines show increased sensitivity to Venetoclax.**

**a**, Summary of genome editing strategy. Top: Two single base substitutions were introduced by CRISPR directed homologous recombination to: i) generate the R1446C mutation; and ii) remove the protospacer adjacent motif (PAM) to prevent further Cas9 binding and repeat cutting of successful edits. Bottom left: Results of amplicon sequencing showing a homozygous edit in 697<sup>KI</sup> cells and a compound heterozygous edit in two REH mutant clones. The alternative sequences for the remaining two alleles were sequenced on TOPO-TA cloned amplicon fragments (sequences, amino acid substitution and TOPO-TA clonal frequency are shown in table below). Bottom right: Western blot of

CREBBP vs. Vinculin protein in 697 edited clones, confirming loss of protein in 697<sup>KO</sup> cells. Marker sizes in kDa shown.

**b**, Growth curves of 697<sup>WT</sup> (black), 697<sup>KI</sup> (blue) and 697<sup>KO</sup> (yellow) grown in the presence of DMSO vehicle (hashed lines) or 10nM Dexamethasone (solid lines). Independent duplicate.

**c**, Dose response curves of two CREBBP/EP300 inhibitors A485 (top) and Inobrodib (bottom) showing enhanced sensitivity of 697<sup>KO</sup> (yellow) compared to 697<sup>WT</sup> (black) in 72h MTS viability assay. n=3 technical replicates, mean±SD.

**d**, Dose response curve of 697<sup>WT</sup> (black) and 697<sup>KO</sup> (yellow) lines to Venetoclax in 72h MTS viability assay. n=3 technical replicates, mean±SD.

**e**, Dose response curve of REH<sup>WT</sup> (green) and two isogenic *CREBBP*-mutant clones (purple and red) to Venetoclax in 72h MTS viability assays. n=3 technical replicates, mean±SD.

**f**, Western blot for cleaved PARP (top) and cleavage of pro-caspase 3 (middle) in 697<sup>WT</sup> (left) and 697<sup>KI</sup> (right) cell lines. Cells were incubated with DMSO vehicle or Venetoclax at either 20nM or 2000nM concentrations. Actin is shown as a loading control (bottom).

Source data are provided as a Source Data file.

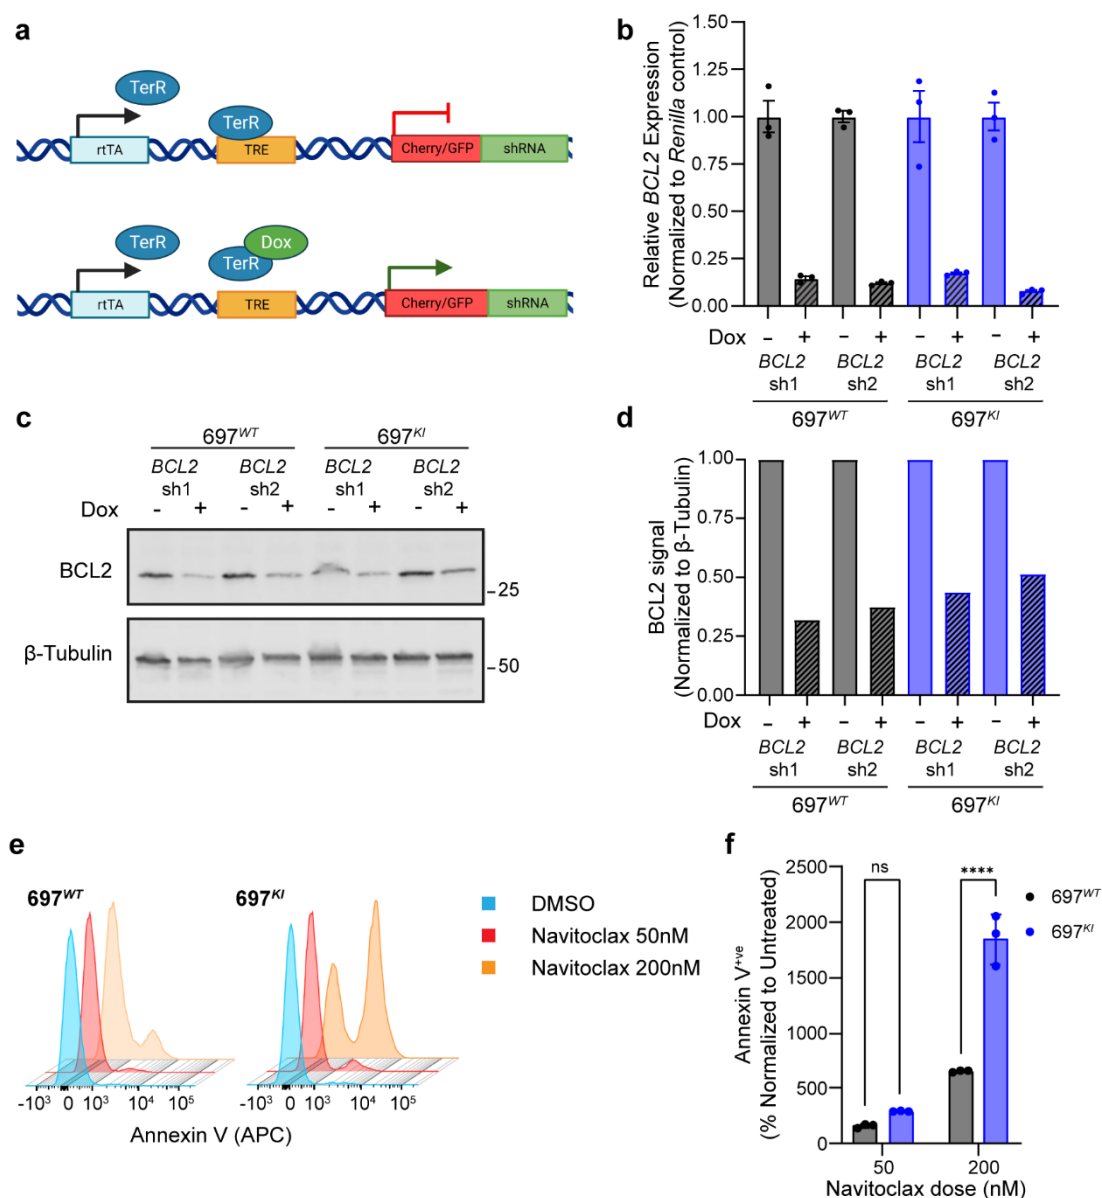

**Supplementary Figure 2: Venetoclax exerts its effect on CREBBP-mutated B-ALL cell lines by on-target inhibition of BCL2.**

**a**, Schematic of doxycycline-inducible shRNA KD system linked to fluorescent reporter proteins<sup>24</sup>. Created in BioRender. Huntly, B. (2025) <https://BioRender.com/q87h680>

**b**, Doxycycline-induced KD of two different *BCL2*-targeting shRNAs measured by RT-qPCR. n=3 technical replicates, internally normalised to *GAPDH* and presented as a ratio to *Renilla* control. Day 3 post induction. Mean±SEM.

**c**, Western blot of BCL2 KD by two different doxycycline-inducible shRNAs in 697<sup>WT</sup> (left) and 697<sup>KI</sup> (right) cells. Day 3 post induction. Beta-Tubulin is presented as a loading control.

**d**, Secondary antibody fluorescence intensity from Fig. S2C normalized to Beta-Tubulin loading control.

**e**, Representative flow cytometry histograms of Annexin-V (APC) externalization in response to escalating doses of Navitoclax in 697<sup>WT</sup> (left) and 697<sup>KI</sup> (right).

**f**, Summary of experiments in Fig. S2E measuring Annexin-V<sup>+</sup><sup>ve</sup> cells normalized to DMSO-treated vehicle control cells. n=3 independent replicates, mean±SD, 2-way ANOVA \*\*\*\*,  $P=0.0000025$ .

Source data are provided as a Source Data file.

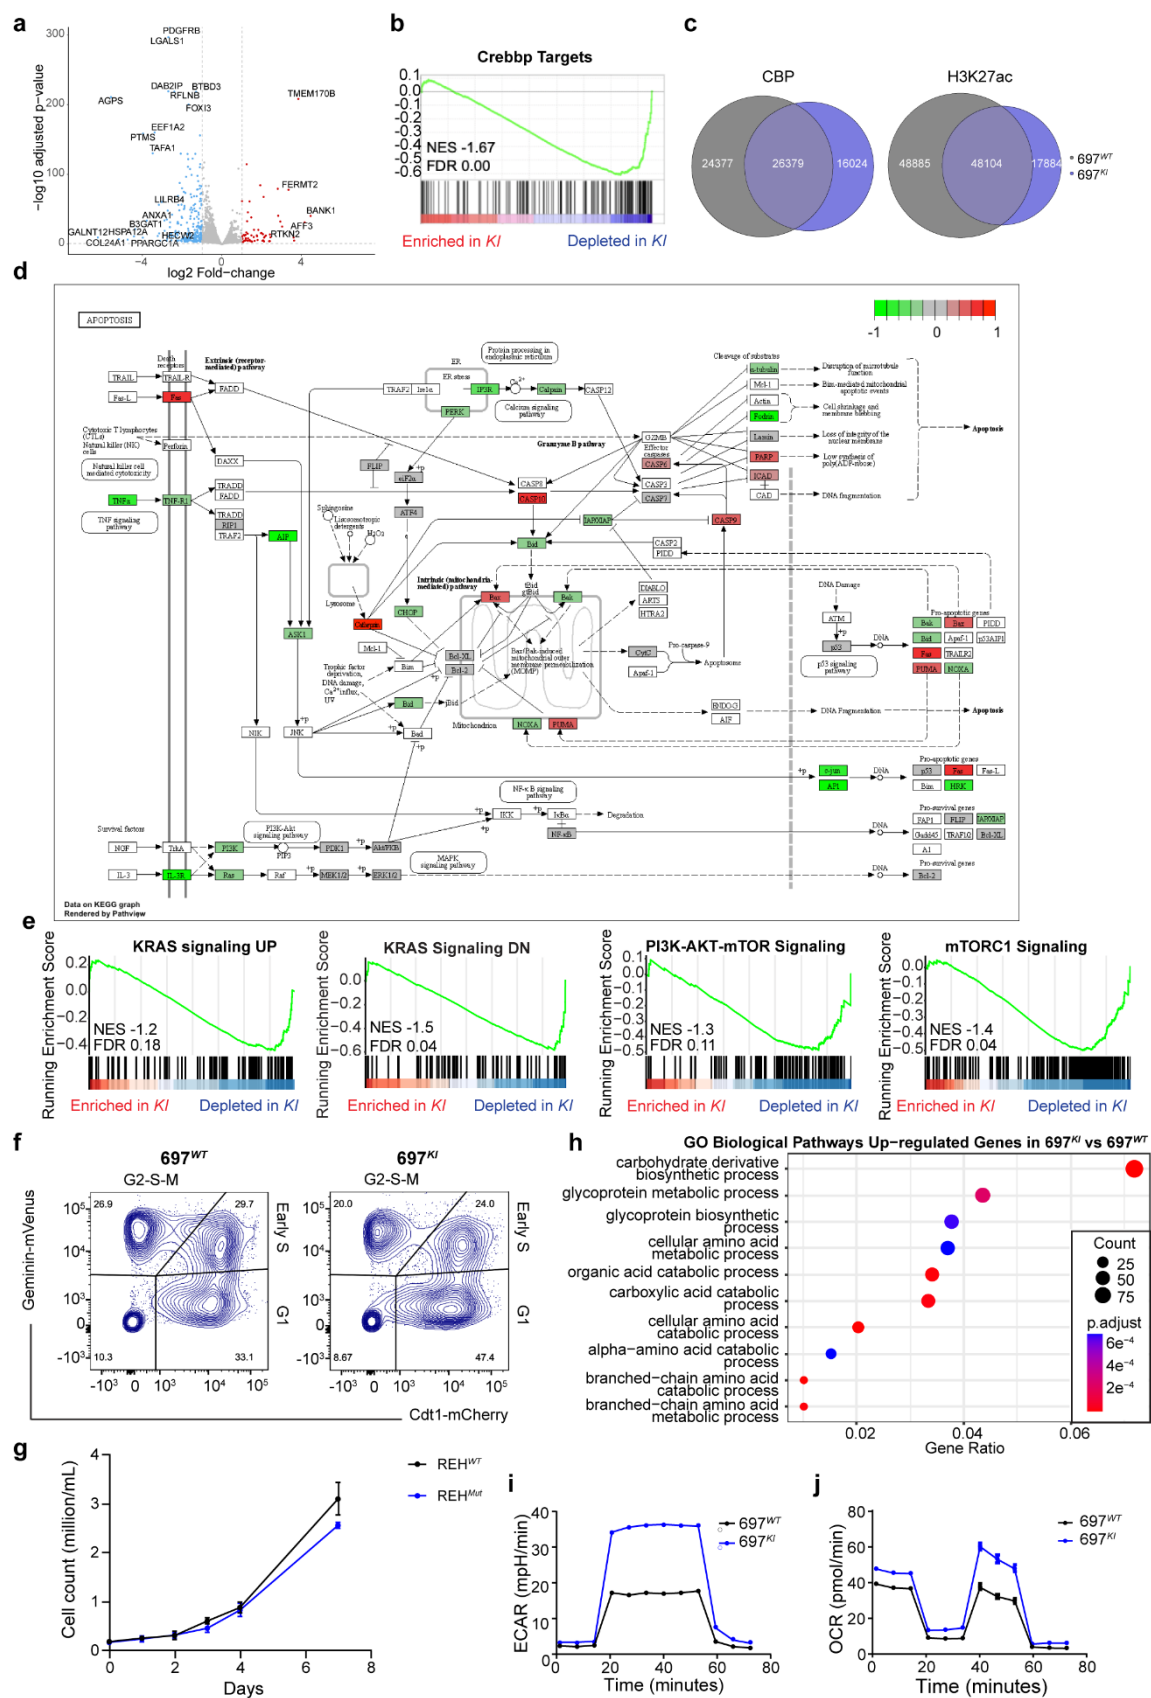

**Supplementary Figure 3: CREBBP-mutated B-ALL cell lines show significant cell cycle and metabolic dysregulation.**

**a**, Volcano plot of DEGs ( $P_{adj}$  and FDR <0.05, LFC >1) by RNAseq comparing 697<sup>Kl</sup> with 697<sup>WT</sup> DMSO vehicle-treated cells.

**b**, GSEA of ranked RNAseq expression of 697<sup>Kl</sup> versus 697<sup>WT</sup> DMSO vehicle-treated cells for known *Crebbp* target genes in *Crebbp*<sup>KO</sup> mouse germinal centre lymphocytes<sup>25</sup>.

**c**, Overlaps of CREBBP CUT&RUN binding sites (left) and H3K27ac ChIP marks (right) in 697<sup>WT</sup> (black) and 697<sup>Kl</sup> (blue).

**d**, KEGG pathway showing differential expression of apoptotic regulators from RNAseq comparing 697<sup>Kl</sup> versus 697<sup>WT</sup> DMSO vehicle-treated cells. Red genes upregulated, green downregulated.

**e**, GSEA of ranked RNAseq expression of 697<sup>Kl</sup> versus 697<sup>WT</sup> DMSO vehicle-treated cells.

**f**, Representative plot of cell cycle stage by FUCCI reporter system in 697<sup>WT</sup> (left) vs. 697<sup>Kl</sup> (right). Percentage viable single cells.

**g**, Proliferation of untreated REH<sup>WT</sup> (black) and REH<sup>Mut</sup> (blue) cells measured by direct counting. n=3 independent replicates, mean±SD.

**h**, Significant up-regulated pathways identified by Gene Ontology (GO) database analysis of RNAseq comparing 697<sup>Kl</sup> versus 697<sup>WT</sup> DMSO vehicle-treated cells.

**i**, Glycolytic rate measured by extracellular acidification rate (ECAR) using Seahorse (Agilent) Glycostress test in 697<sup>WT</sup> (black) and 697<sup>Kl</sup> (blue) cells. Representative ECAR plot over time. Mean±SEM.

**j**, Mitochondrial oxygen consumption rate (OCR) measured using Seahorse (Agilent) Mitostress test. Representative OCR plot over time. Mean±SEM.

Source data are provided as a Source Data file.

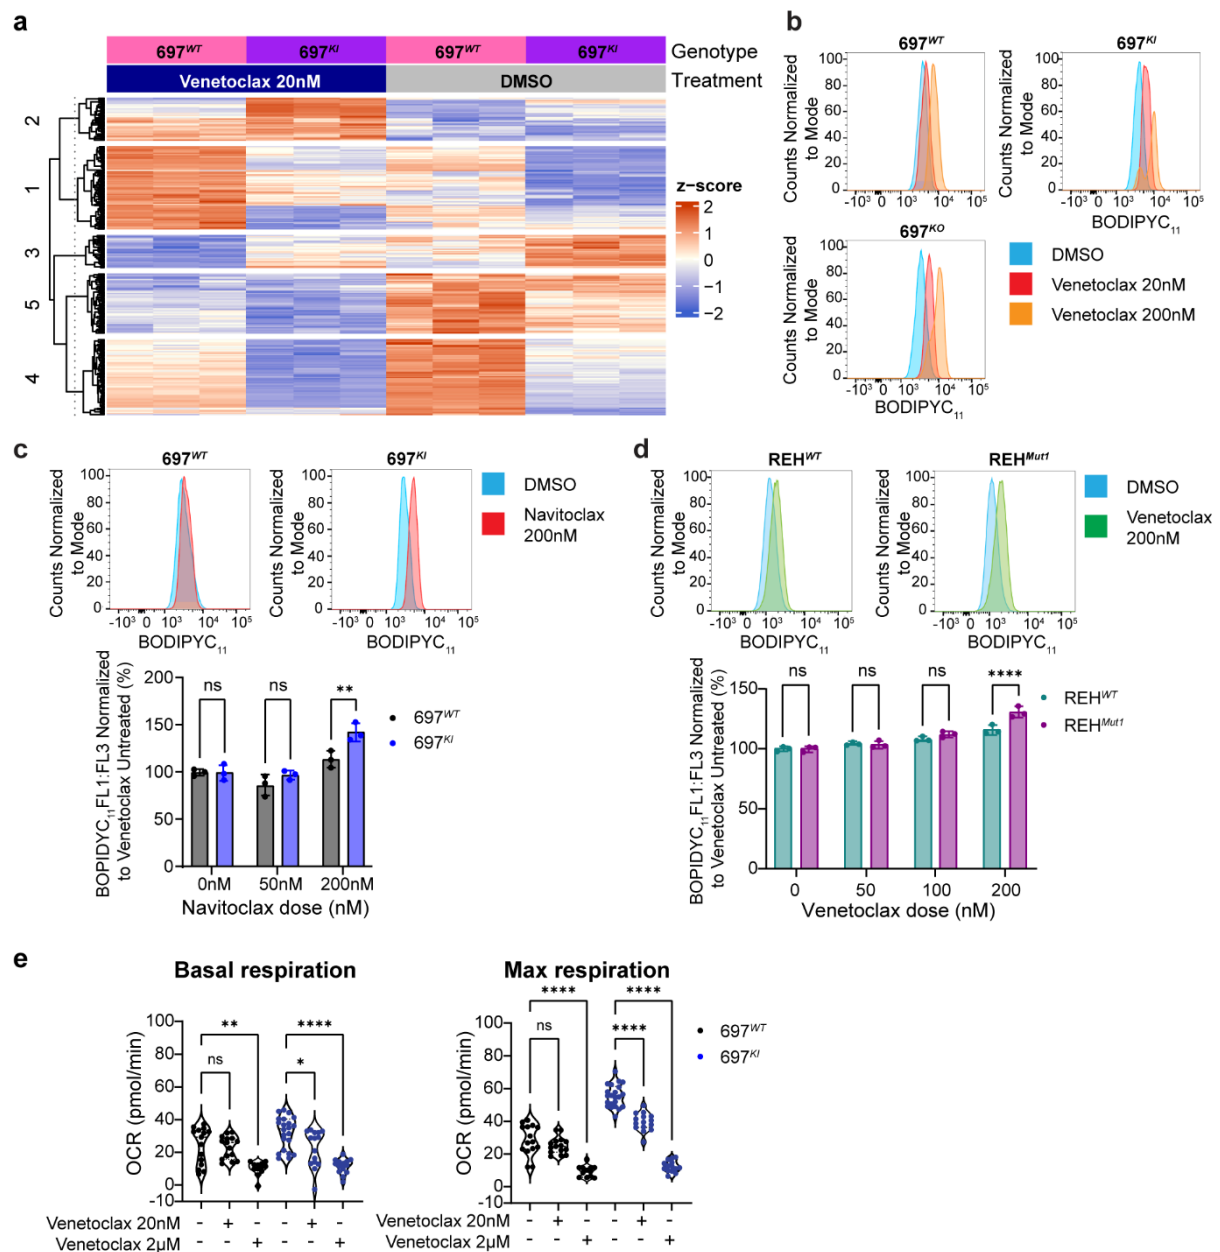

**Supplementary Figure 4: Venetoclax induces ferroptotic cell death in *CREBBP*-mutated B-ALL cell lines.**

**a**, Four-way interaction model identifies 1487 genes (FDR 0.05) differentially expressed specifically in Venetoclax-treated 697<sup>KI</sup> cells.

**b**, Representative histogram of flow cytometric BODIPY<sub>11</sub> staining (488nm 530/30) of 697<sup>WT</sup> (left), 697<sup>KI</sup> (right) and 697<sup>KO</sup> (bottom) cells in response to increasing doses of Venetoclax (DMSO: blue; Venetoclax 20nM: red; Venetoclax 200nM: orange).

**c**, Top panel: representative histogram of flow cytometric BODIPY<sub>11</sub> staining (488nm 530/30) of 697<sup>WT</sup> (left) and 697<sup>KI</sup> (right) cells in response to 200nM Venetoclax (red) or DMSO vehicle (blue). Bottom panel: summary BODIPY<sub>11</sub> staining 697<sup>WT</sup> (black) and 697<sup>KI</sup> (blue) cells in response to 50nM Venetoclax, 200nM Venetoclax or DMSO vehicle normalized to DMSO vehicle. Independent triplicate, mean±SD, two-way ANOVA, \*\*,  $P=0.0033$



**d**, Top panel: representative histogram of flow cytometric BODIPY<sub>C11</sub> staining (488nm 530/30) of REH<sup>WT</sup> (left) and REH<sup>Mut1</sup> (right) cells in response to 200nM of Venetoclax. Bottom panel: summary BODIPY<sub>C11</sub> staining REH<sup>WT</sup> (green) and REH<sup>Mut1</sup> (purple) cells in response to Venetoclax normalized to DMSO vehicle. Independent triplicate, each dot represents a single sample, mean±SD, two-way ANOVA, \*\*\*\*,  $P=0.00005$ .

**e**, Summary of basal (left) and maximal (right) mitochondrial oxygen consumption rate (OCR) measured using Seahorse (Agilent) Mitostress test in 697<sup>WT</sup> (black) and 697<sup>KI</sup> (blue) cells exposed to increasing concentrations of Venetoclax. Each dot represents a single sample acquired from two separate experiments. One way ANOVA \*\*\*\*, Basal respiration:  $P=1.5 \times 10^{-8}$ ; Maximal respiration: 697<sup>WT</sup> DMSO vs. 2μM  $P=3.6 \times 10^{-10}$ , 697<sup>KI</sup> DMSO vs. 20nM  $P=5.4 \times 10^{-10}$ , 697<sup>KI</sup> DMSO vs. 2μM  $P=3 \times 10^{-10}$ , \*\*,  $P=0.0012$ ; \*,  $P=0.0176$ .

Source data are provided as a Source Data file.

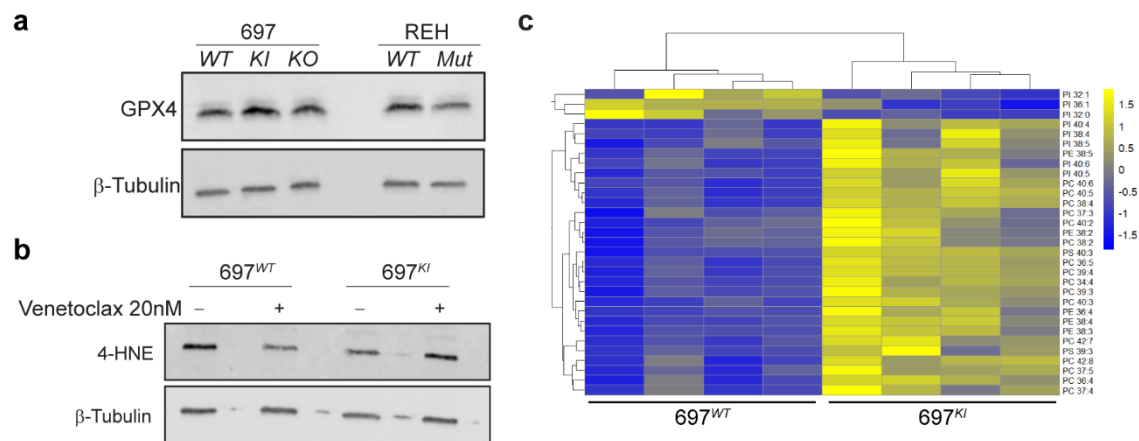

### Supplementary Figure 5: CREBBP-mutation affects the redox balance and lipid content of B-ALL cell lines

**a**, Western blot comparing GPX4 expression in 697<sup>WT, KI, KO</sup> (left) and REH<sup>WT, Mut</sup> (right). β-tubulin loading control.

**b**, Western blot of 4-hydroxyneonal (4-HNE) adducts in 697<sup>WT</sup> and 697<sup>KI</sup> in presence of DMSO control or low dose Venetoclax (20nM). β-tubulin loading control.

**c**, Hierarchically clustered heatmap of selected phosphatidylinositol (PI), phosphatidylethanolamine (PE) and phosphatidylcholine (PC) lipids that differ significantly between 697<sup>WT</sup> (left) and 697<sup>KI</sup> (right). n=4 independent replicates. Relative normalized expression.

Source data are provided as a Source Data file.

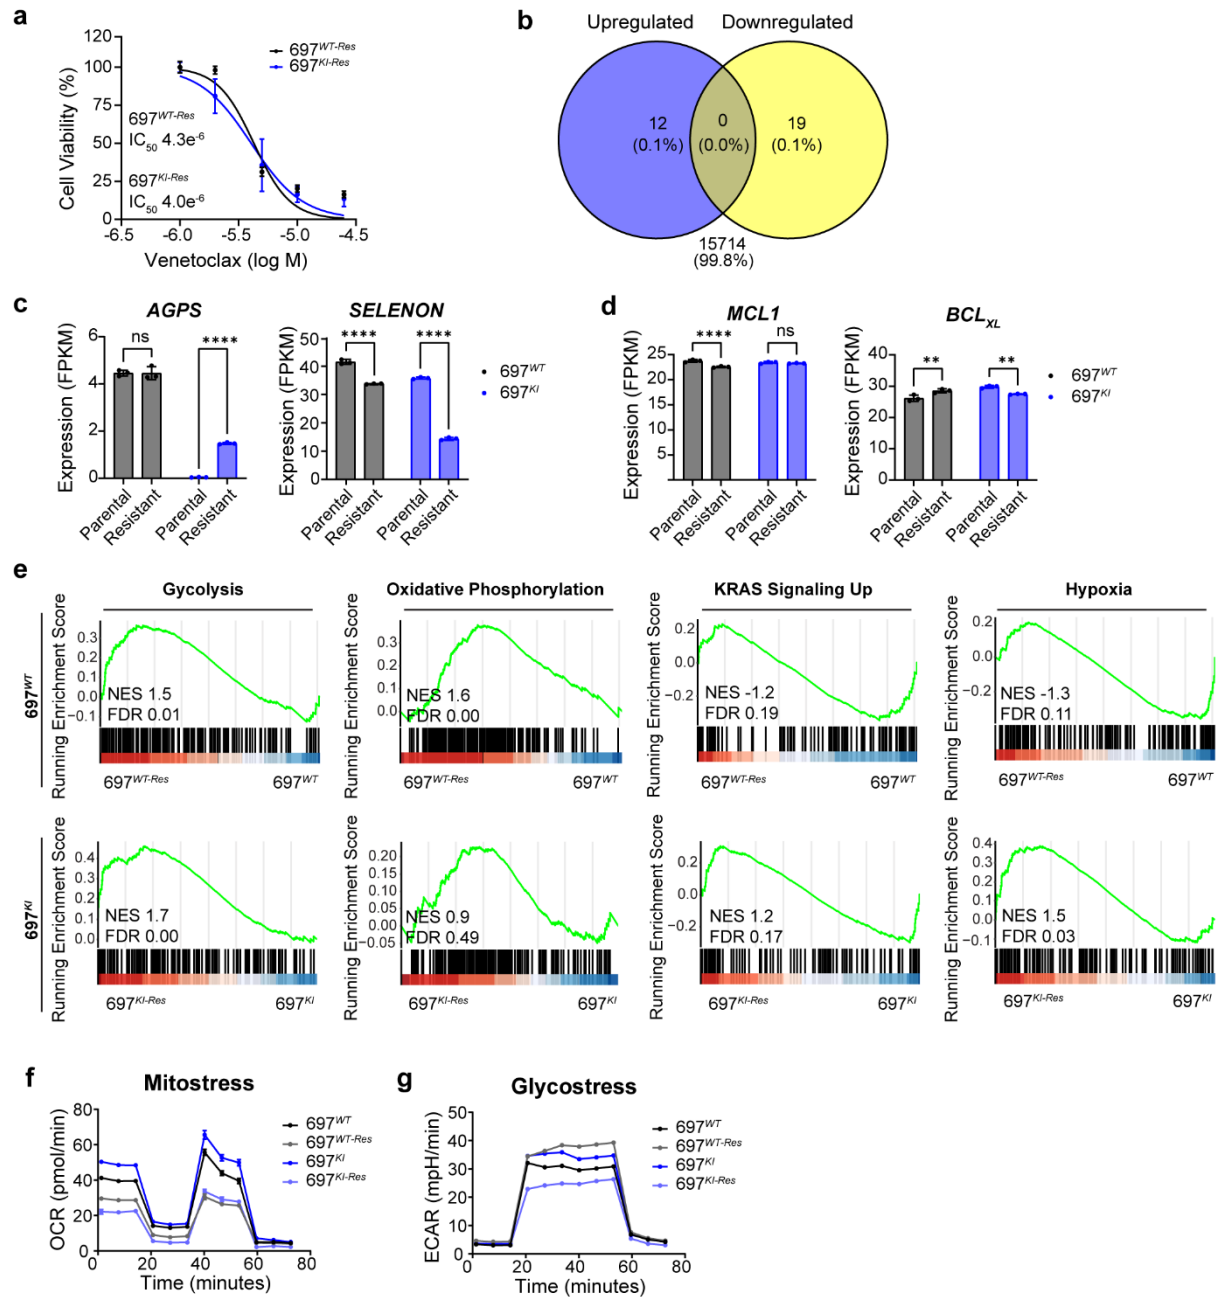

**Supplementary Figure 6: Acquisition of Venetoclax resistance results in transcriptional convergence**

**a**, Dose response curve of 697<sup>WT-Res</sup> (black) and 697<sup>KI-Res</sup> (blue) to Venetoclax in 72h MTS viability assays.  $n=3$  technical replicates, mean $\pm$ SD.

**b**, Number of up- and down-regulated DEGs (LFC>1) by RNAseq comparing 697<sup>WT-Res</sup> and 697<sup>KI-Res</sup> cells.

**c**, Comparison of *AGPS* (left) and *SELENON* (right) expression levels by RNAseq in 697<sup>WT</sup> (black) and 697<sup>KI</sup> (blue) cells comparing parental and Venetoclax-resistant lines. Each dot represents one sample. Bars show mean FPKM value $\pm$ SD,  $n=3$  independent replicates. Two-way ANOVA, \*\*\*\*, *AGPS*  $P=6\times 10^{-6}$ , *SELENON* 697<sup>WT</sup>  $P=1.3\times 10^{-7}$ , 697<sup>KI</sup>  $P=3.9\times 10^{-11}$ .

**d**, Comparison of *MCL1* (left) and *BCL<sub>XL</sub>* (*BCL2L1* gene) (right) expression levels by RNAseq in 697<sup>WT</sup> (black) and 697<sup>KI</sup> (blue) cells comparing parental and Venetoclax-resistant lines. Each dot represents

one sample. Bars show mean FPKM value $\pm$ SD, n=3 independent replicates. Two-way ANOVA, \*\*\*\*,  $P=8.6\times 10^{-5}$ ; \*\*,  $P=0.0045$ .

**e**, GSEA of ranked RNAseq expression comparing 697<sup>WT-Res</sup> (left) and 697<sup>KI-Res</sup> (right) with their matched parental lines.

**f**, Representative mitochondrial oxygen consumption rate (OCR) measured using Seahorse (Agilent) Mitostress test in 697<sup>WT</sup> (black) and 697<sup>KI</sup> (blue) cells comparing parental and resistant lines. Mean $\pm$ SEM.

**g**, Representative plot of glycolytic rate measured by extracellular acidification rate (ECAR) using Seahorse (Agilent) Glycostress test in 697<sup>WT</sup> (black) and 697<sup>KI</sup> (blue) cells comparing parental and resistant lines. Mean $\pm$ SEM.

Source data are provided as a Source Data file.

**a**

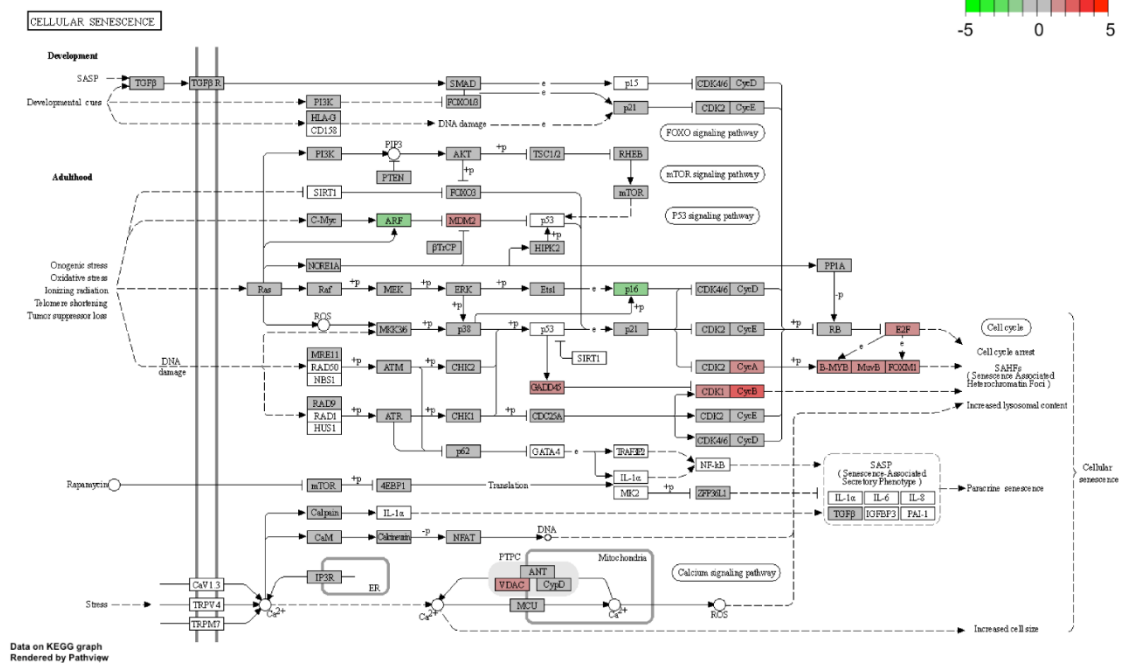

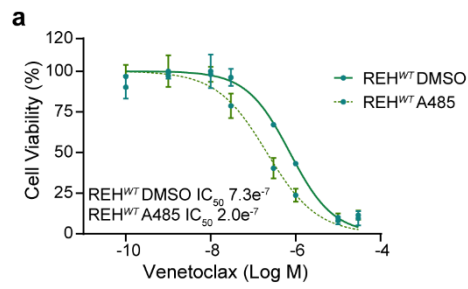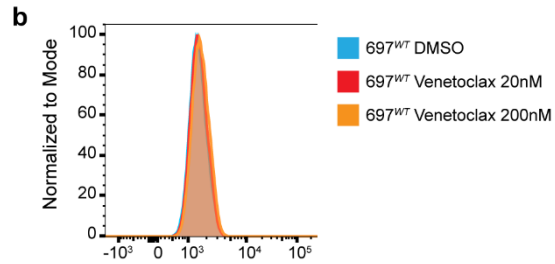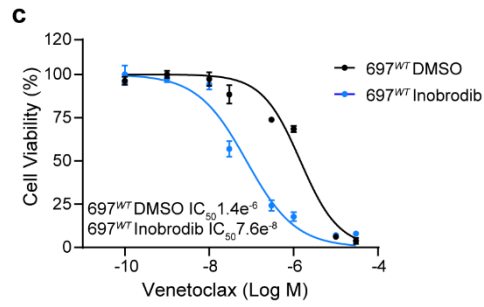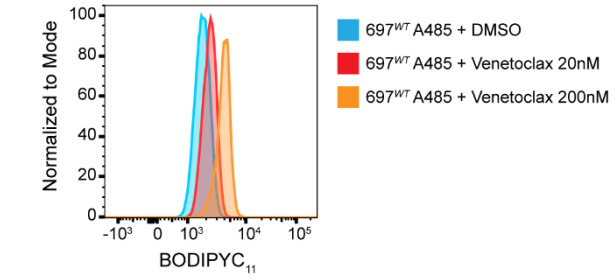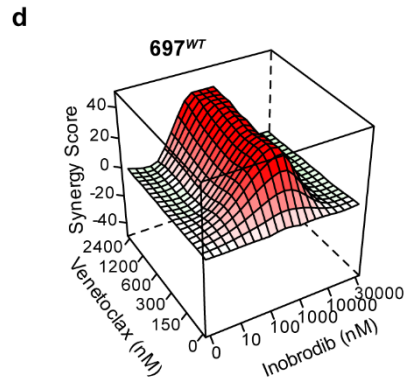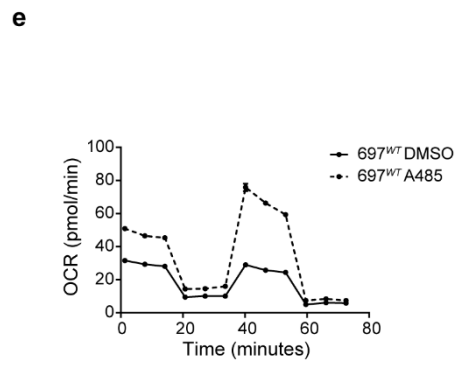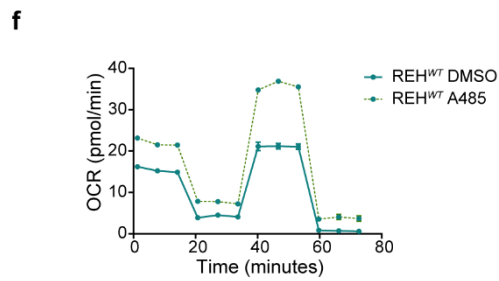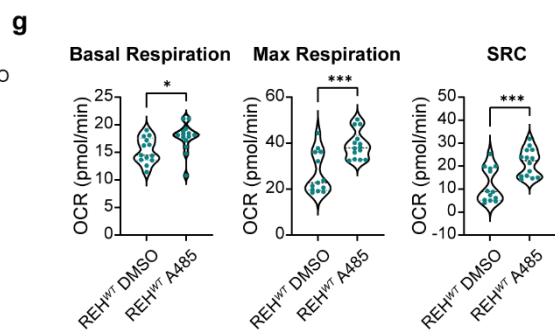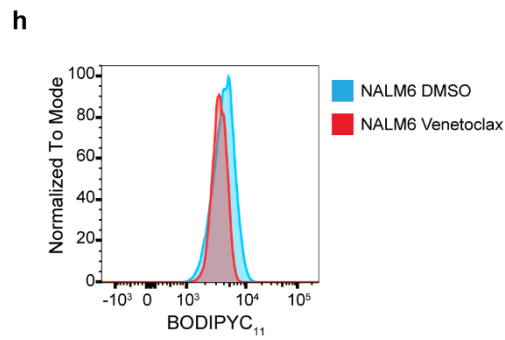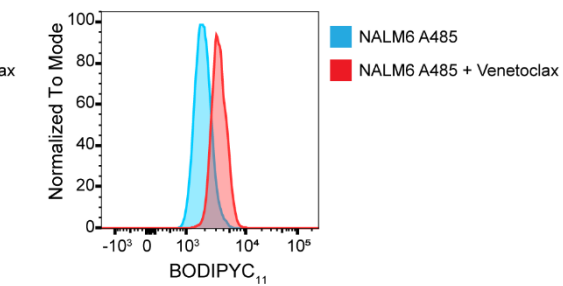

**Supplementary Figure 8: Pharmacological inhibition of CREBBP function can sensitize B-ALL cell lines to Venetoclax *in-vitro*.**

**a,** Dose response curve of REH<sup>WT</sup> (solid line) and REH<sup>WT</sup> pre-treated with 3 days of A485 (hashed line) to Venetoclax in 72 hour MTS viability assays. n=3 technical replicates, mean±SD.

**b,** Representative histogram of flow cytometric BODIPYC<sub>11</sub> staining of 697<sup>WT</sup> (top) and 697<sup>WT</sup> pre-treated with A485 (bottom) in response to increasing doses of Venetoclax.

**c,** Dose response curve of 697<sup>WT</sup> (black) and 697<sup>WT</sup> pre-treated with 3 days of Inobrodib (pale blue) to Venetoclax in 72h MTS viability assays. n=3 technical replicates, mean±SD.

**d,** Three-dimensional diffusion plot of ZIP synergy score to combined doses of synchronous Inobrodib and Venetoclax (peak ZIP 37.58). Viability measured by 72h MTS assay.

**e,** Representative mitochondrial oxygen consumption rate (OCR) measured using Seahorse (Agilent) Mitostress test in 697<sup>WT</sup> (solid line) compared to 697<sup>WT</sup> treated with A485 (hashed line). Mean±SEM.

**f,** Representative mitochondrial oxygen consumption rate (OCR) measured using Seahorse (Agilent) Mitostress test in REH<sup>WT</sup> (solid line) compared to REH<sup>WT</sup> treated with A485 (hashed line). Mean±SEM.

**g,** Summary of basal (left) and maximal (middle) mitochondrial oxygen consumption rate (OCR) and spare respiratory capacity (right) measured using Seahorse (Agilent) Mitostress test in REH<sup>WT</sup> cells treated with A485 or DMSO vehicle. Each dot represents a single replicate acquired from two separate experiments. Unpaired *t*-test, \*\*\*, *P* > 0.0001; \*, *P* = 0.0198.

**h,** Representative histogram of flow cytometric BODIPYC<sub>11</sub> staining of NALM6<sup>WT</sup> (left) and NALM6<sup>WT</sup> pre-treated with A485 (right) in response to Venetoclax.

Source data are provided as a Source Data file.

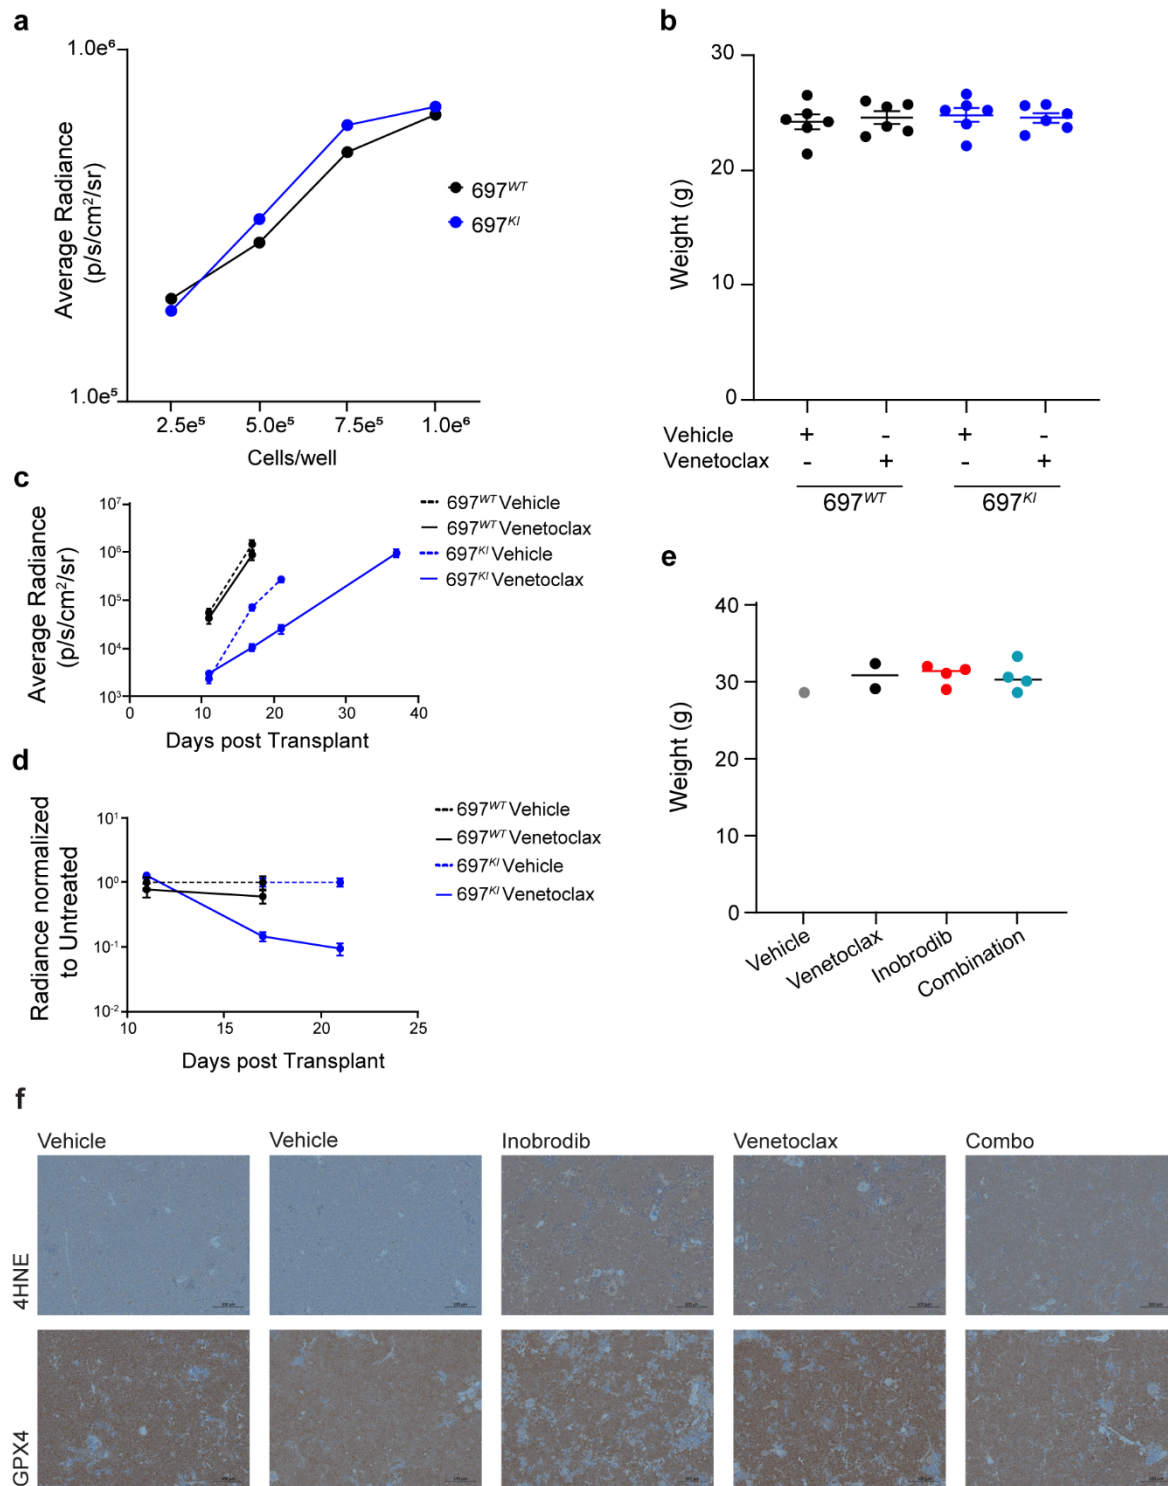

**Supplementary Figure 9: Genetic or pharmacological inhibition of CREBBP sensitizes B-ALL to Venetoclax *in-vivo*.**

**a**, *In-vitro* BLI measurements of a serial dilution of luciferase-expressing 697<sup>WT</sup> vs. 697<sup>KI</sup> B-ALL cells (log p/s/cm<sup>2</sup>/sr).

**b**, Baseline weights of NSG mice treated in Fig. 7A-F. Mean±SEM.



**c,** Average BLI radiance of mice engrafted with 697<sup>WT</sup> or 697<sup>KI</sup> cells treated with Venetoclax or vehicle control at days 11, 17 and 21 and 37 (697<sup>KI</sup> only) of treatment (log p/s/cm<sup>2</sup>/sr). Mean±SEM. n=6 mice per group (n=5 in 697<sup>KI</sup> Vehicle due to imaging failure, n=5 697<sup>KI</sup> Venetoclax D37 due to one prior death).

**d,** Average BLI radiance of mice engrafted with 697<sup>WT</sup> or 697<sup>KI</sup> cells treated with Venetoclax or vehicle control at days 11, 17 and 21 (697<sup>KI</sup> only) of treatment (log p/s/cm<sup>2</sup>/sr) normalized to untreated 697<sup>KI</sup> recipients. Mean±SEM. n=6 mice per group (n=5 in 697<sup>KI</sup> Vehicle due to imaging failure).

**e,** Baseline weights of NSG mice treated in Fig. 7G. Bar represents median average.

**f,** Immunohistochemical staining for 4-HNE adducts (top) and GPX4 protein expression (bottom) in B-ALL PDX-infiltrated spleens from NSG mice, comparing two Vehicle treated control mice (left & centre left) with mice acutely treated with 2 doses of Inobrodib (centre), Venetoclax (centre right), or combination (right) treatment.

Source data are provided as a Source Data file.

## Gating strategy for JC1 (Mitochondrial depolarisation)

Figure 1F

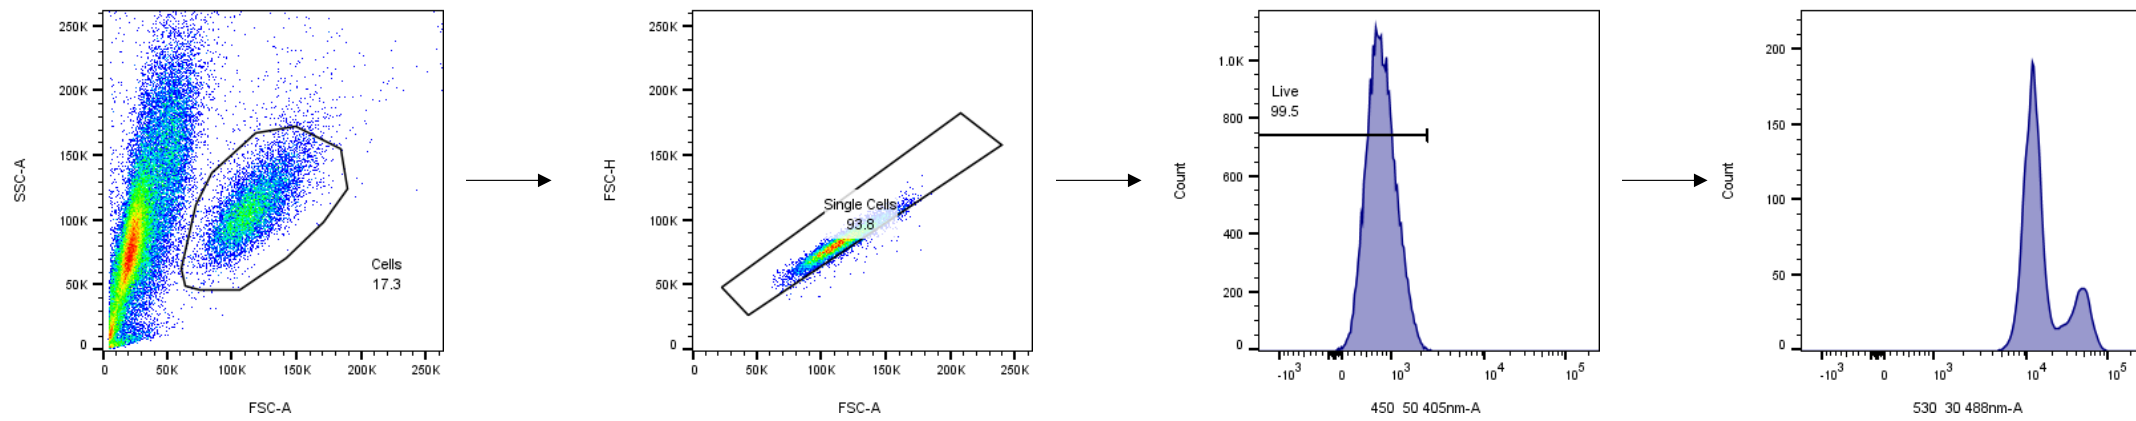

Gating strategy for Annexin V APC

Figure 1G, H; 2C, D; 6F

Supplementary figures 2E, F

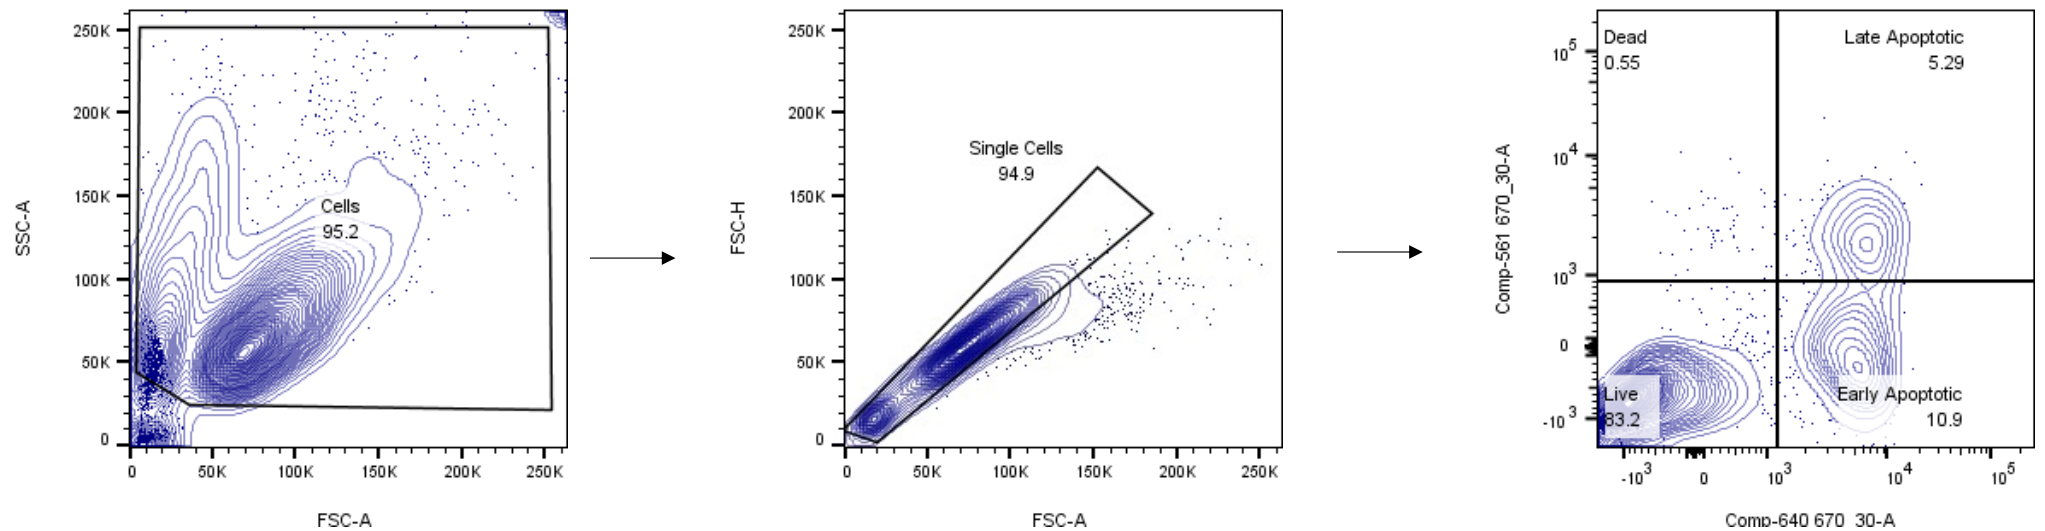

Gating strategy for shRNA fluorescent reporting proteins.

Figure 2B

Supplementary figure 2B

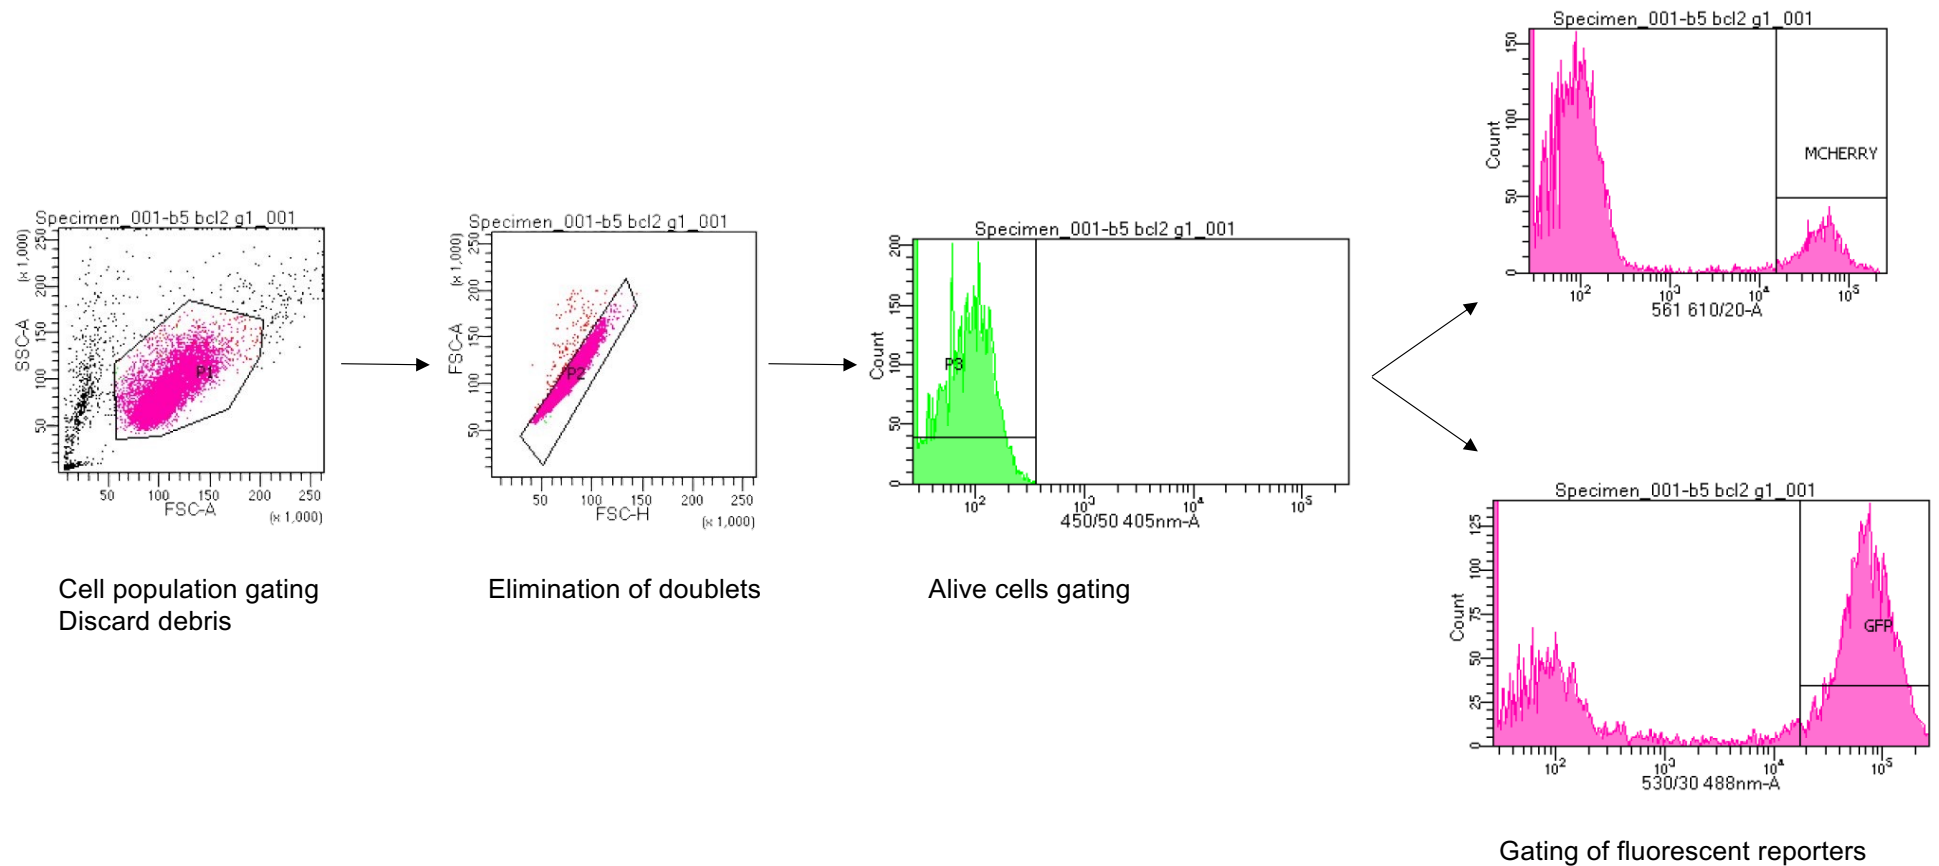

Gating strategy for Fucci reporter system

Figure 3G

Supplementary figures 3F

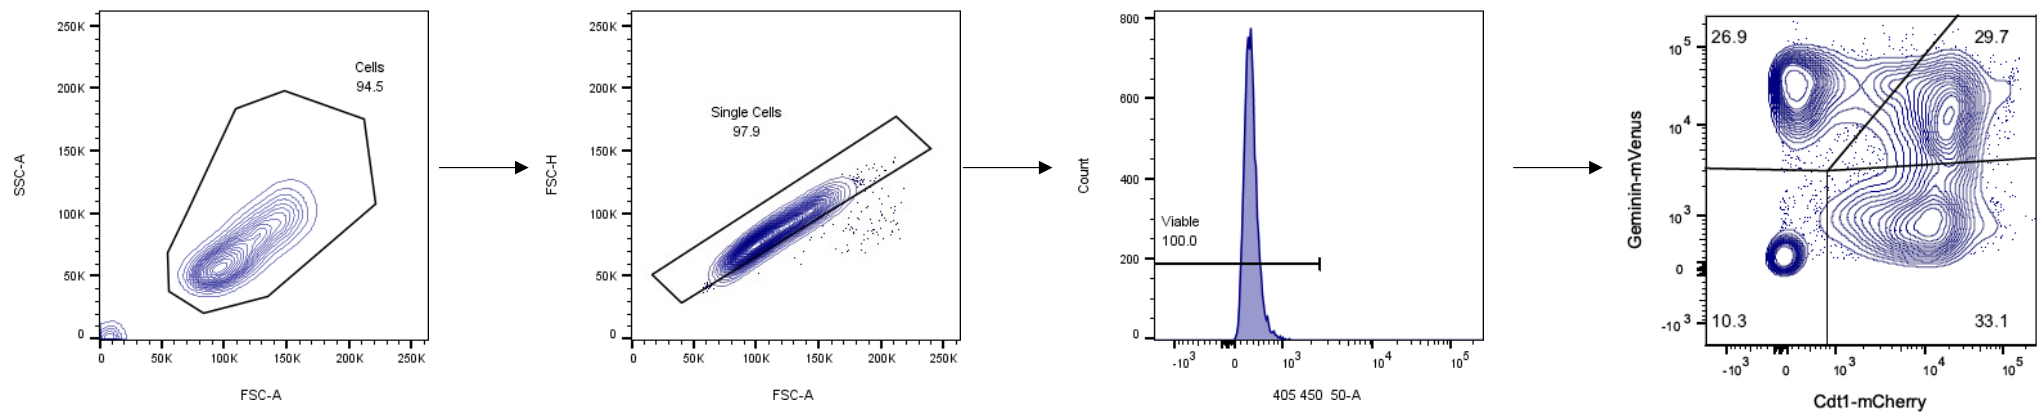

## Gating strategy for BODIPYC11

Figure 4E, G; 5B; 6C, H;

Supplementary figures 4B, C, D; 6B, H

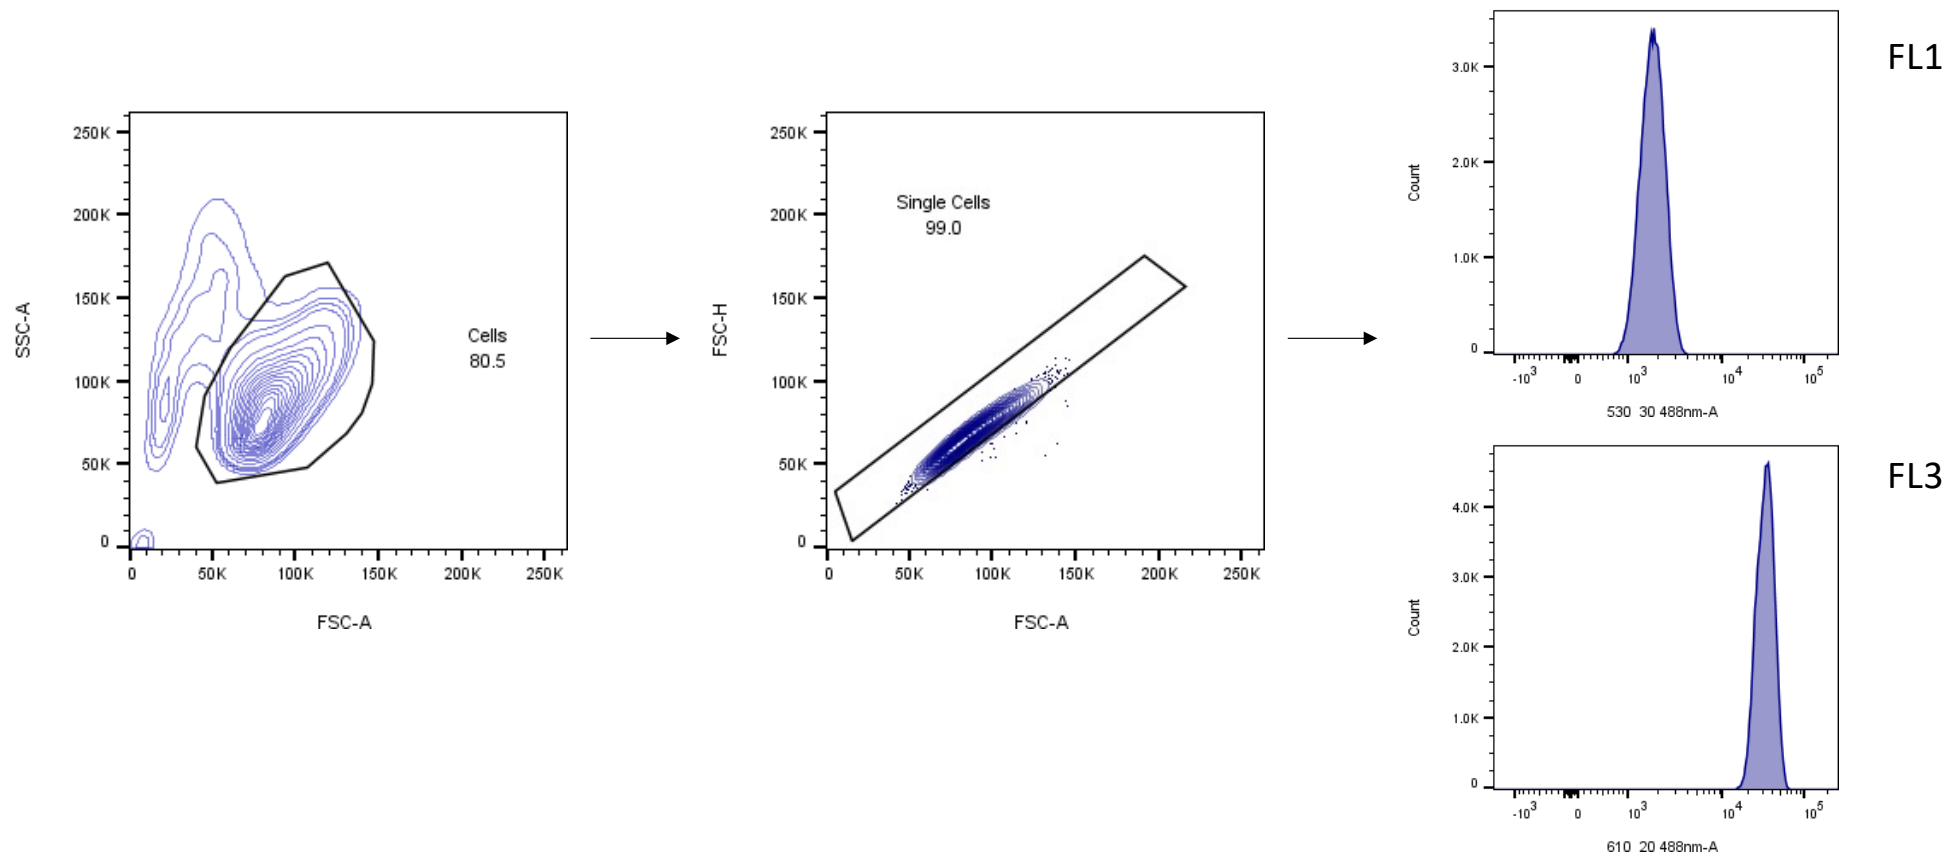

Supplement: MOESM1 [file 41467_2025_59531_MOESM1_ESM.pdf]
